# Supplementary material
Source: publisher figshare collection journal article supplement (https://acs.figshare.com/ndownloader/files/4549231)

# SUPPORTING INFORMATION

## Self Assembly of Coiled-Coil Peptide- Porphyrin Complexes.

*Bashkim Kokona, Andrew M. Kim, R. Claire Roden, Joshua P. Daniels, Brian J. Pepe-Mooney, Brian C. Kovaric, Julio C. de Paula,<sup>§</sup> Karl A. Johnson, and Robert Fairman\**

Department of Biology, Haverford College, 370 Lancaster Ave, Haverford, PA 19041

<sup>§</sup>Current Address: Department of Chemistry, Lewis and Clark College, 0615 SW  
Palatine Hill Rd., Portland, OR 97219

**Figure S1.** Tapping-mode AFM images of 100  $\mu$ M Cp3K in 10 mM Tris-HCl, pH 7.8 and 0.1 M NaCl.

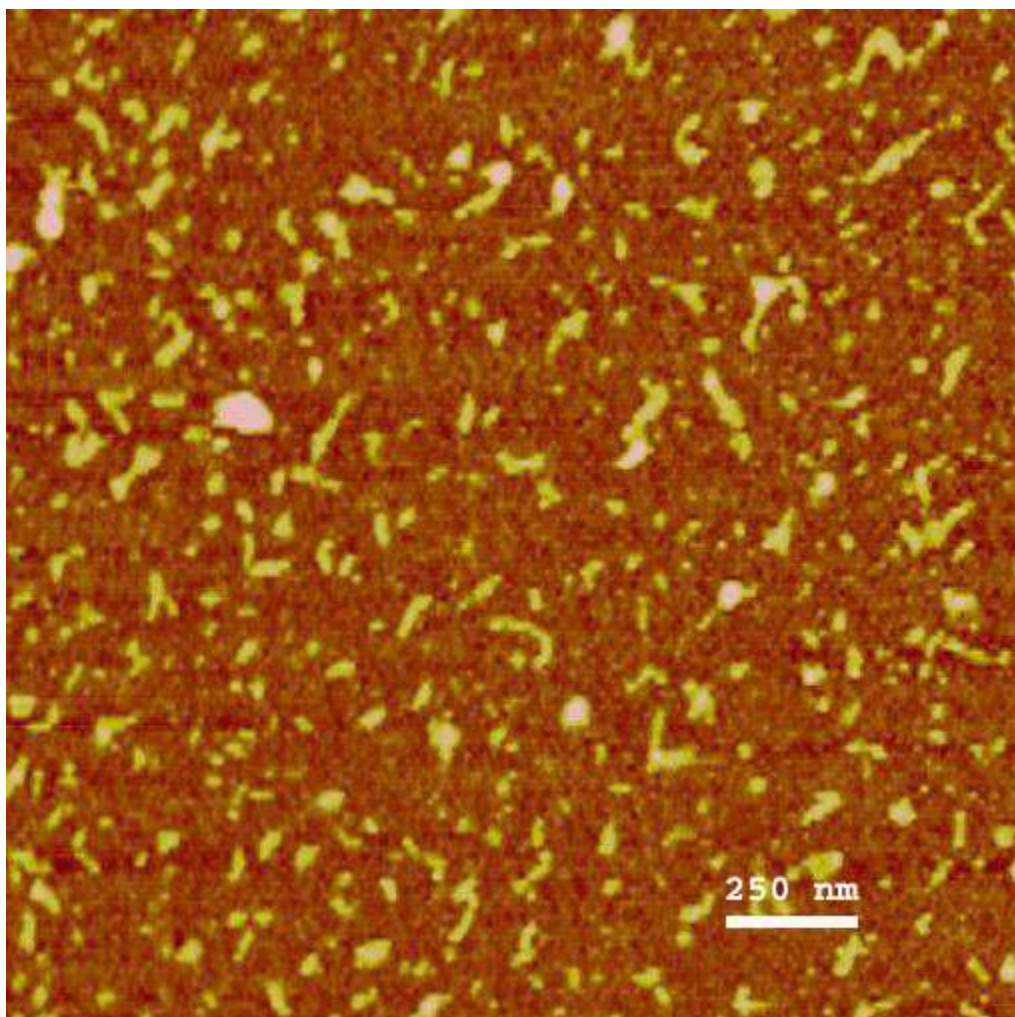

**Figure S2.** CD spectra of Cp3K in  $\alpha$ -helix and  $\beta$ -sheet conformations. Cp3K concentration is 100  $\mu$ M in 10mM Tris-HCl, pH 7.8 prepared with fresh stock solution and aged stock solution.

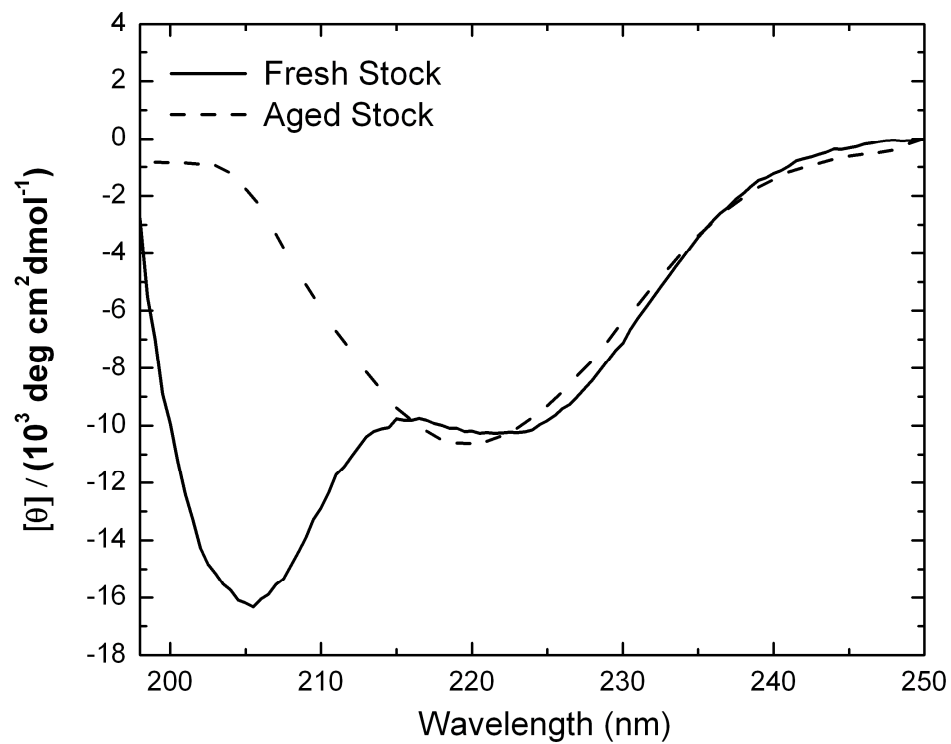

**Figure S3.** Tapping-mode AFM image of 100  $\mu$ M Cp3K in cross- $\beta$ -sheet fibril conformation.

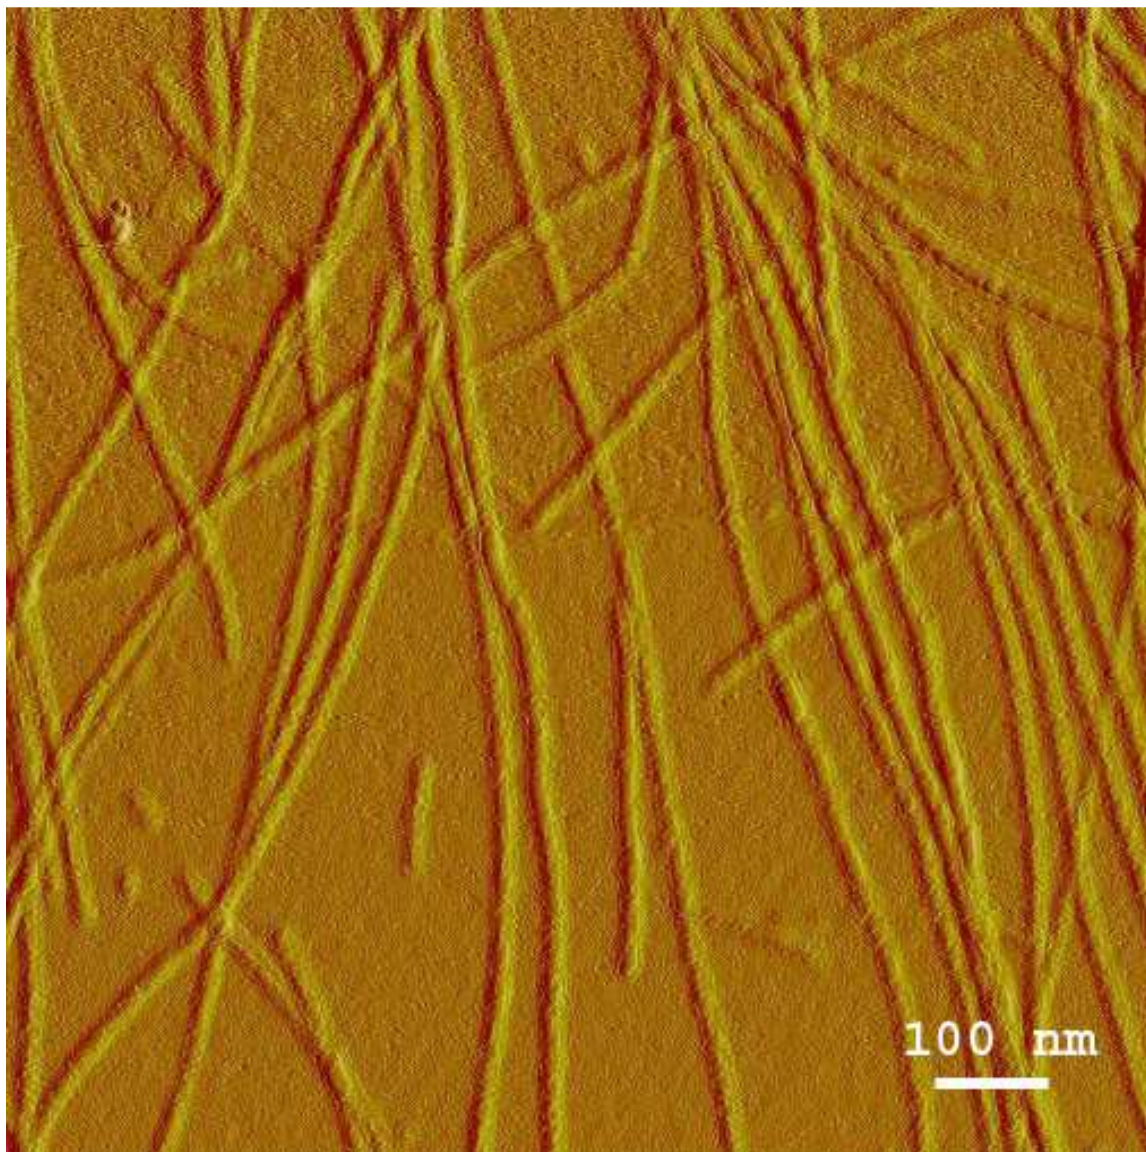

Supplement: Supplementary file 1 [file 4549231]
